# Supplementary material
Source: ML conference proceedings conference paper supplement (https://openreview.net/forum?id=hJ5DREWdjs)

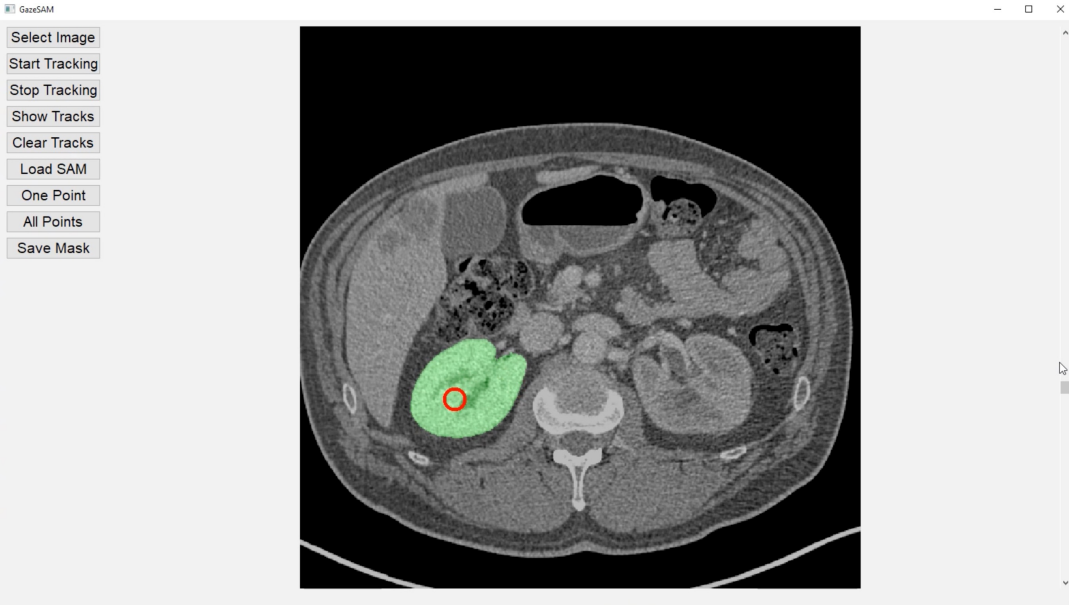

(a) GazeSAM User Interface

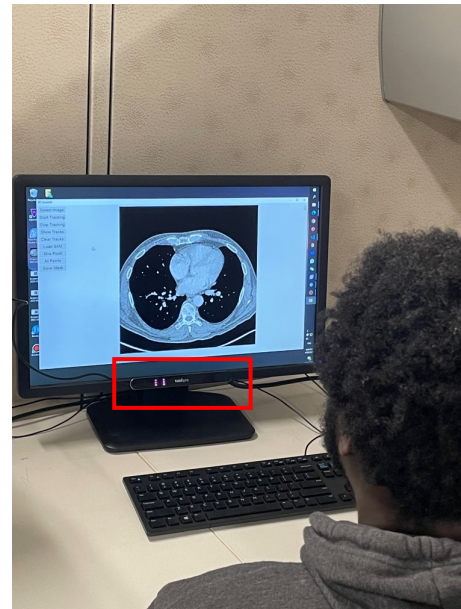

(b) Eye-Gaze Collection

Supplement: supplementary_material [file attachment]

## ***GazeSAM System***

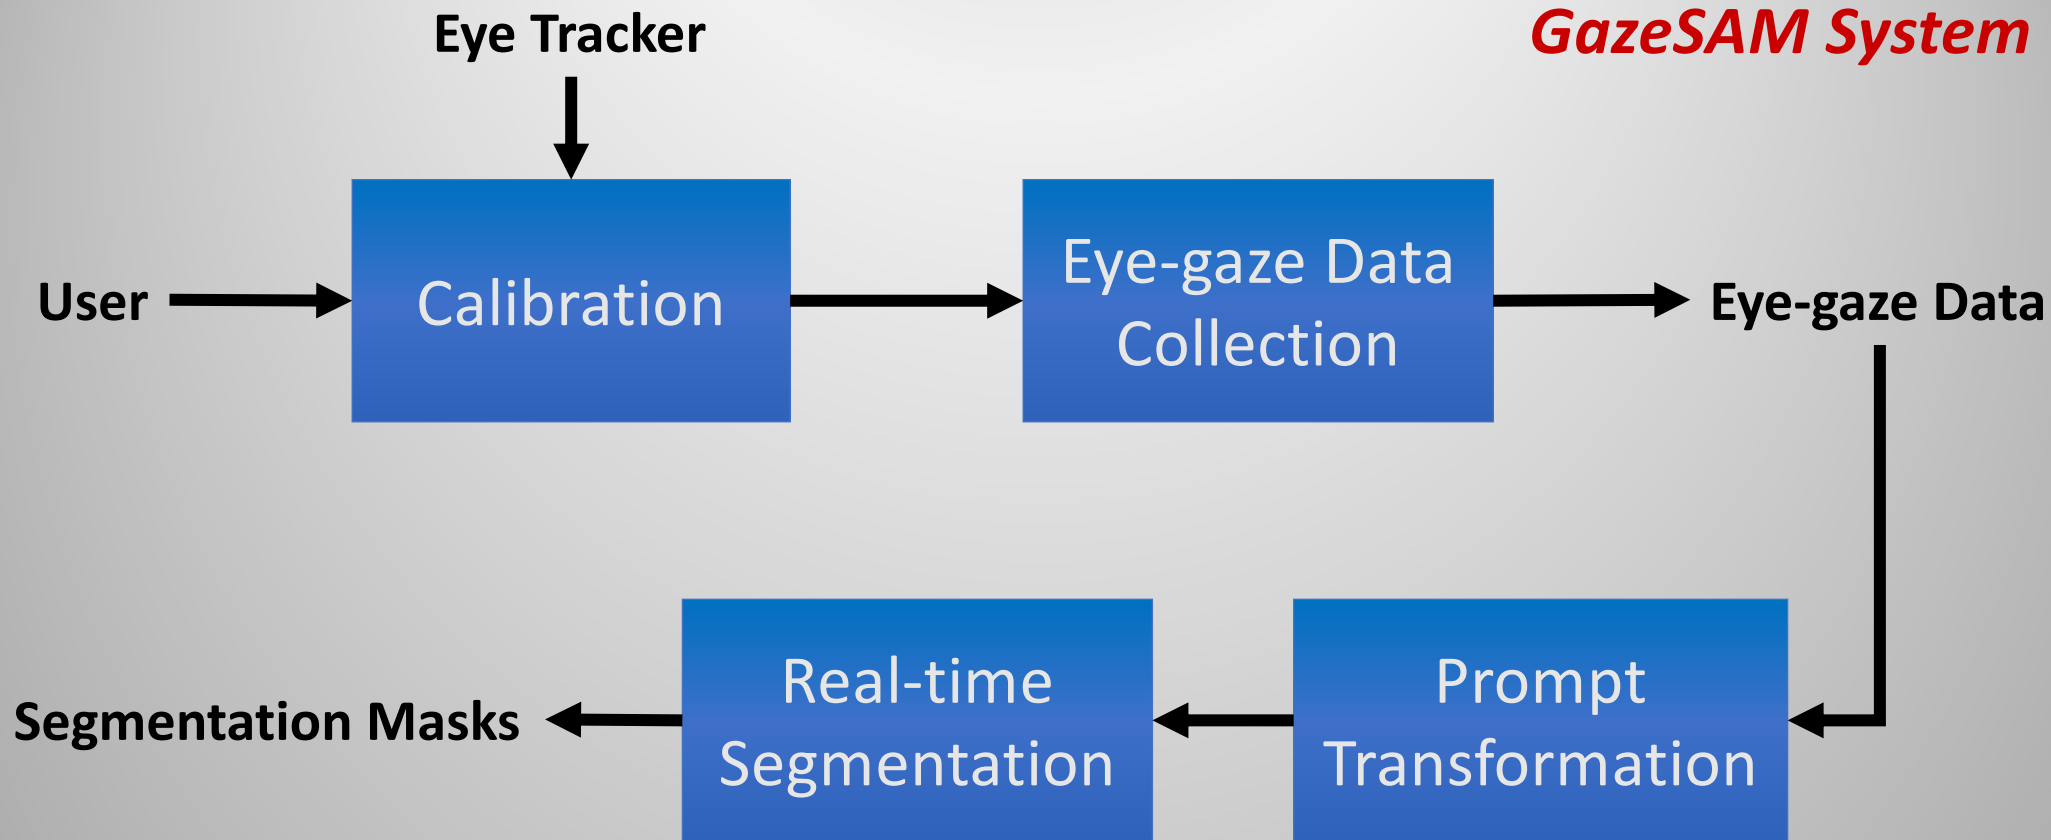

Supplement: supplementary_material [file attachment]

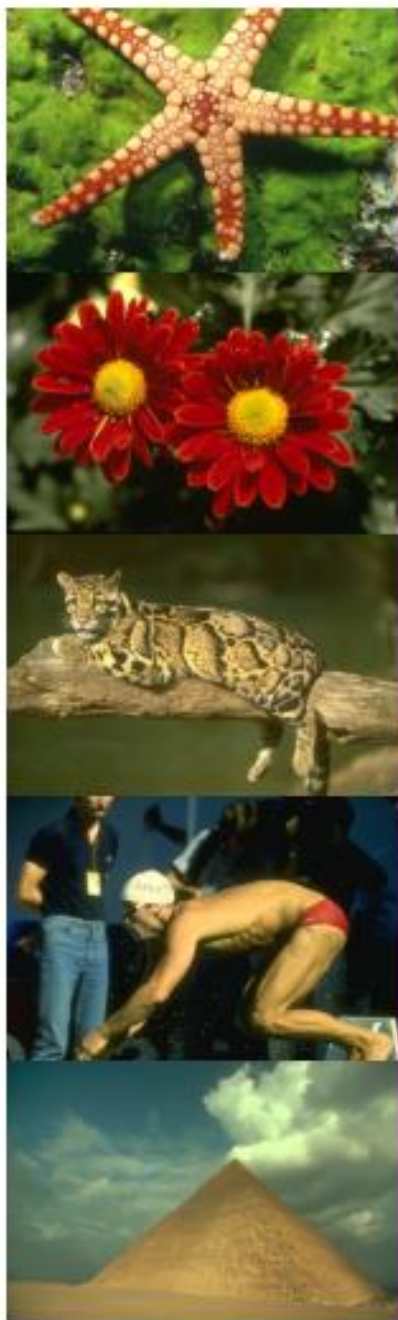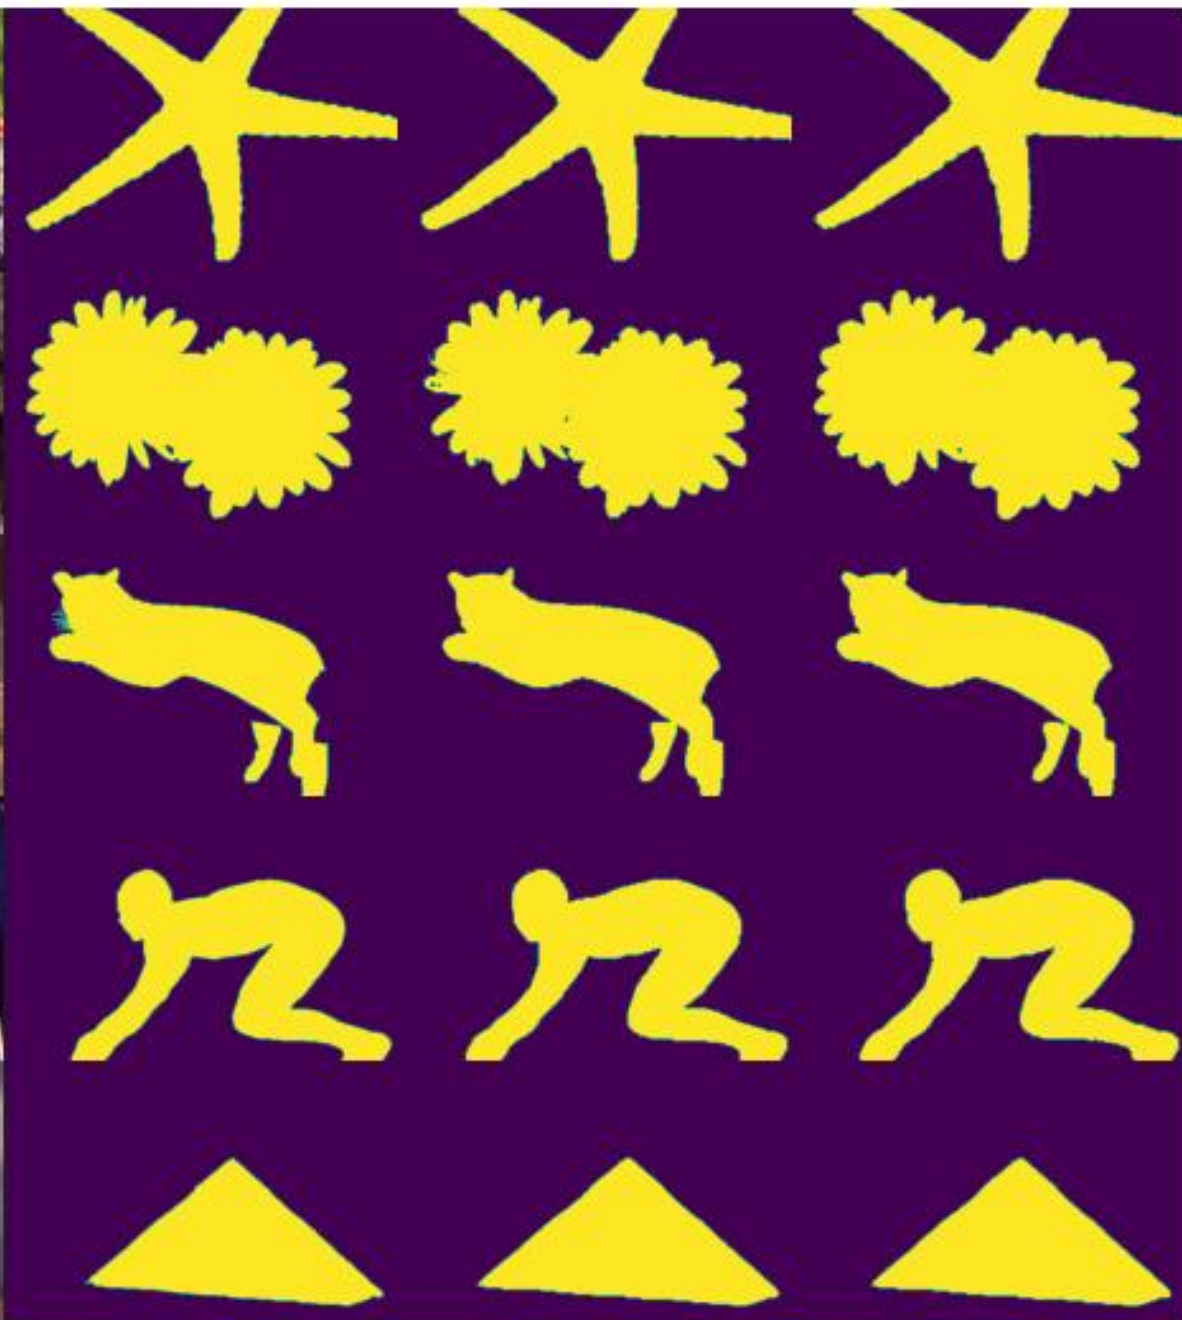

Image

Ground Truth

Eye Gaze-based

Mouse-based

Supplement: supplementary_material [file attachment]

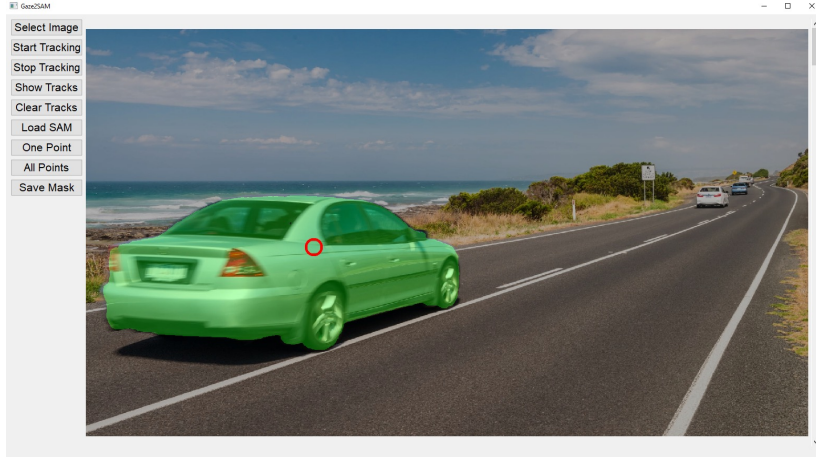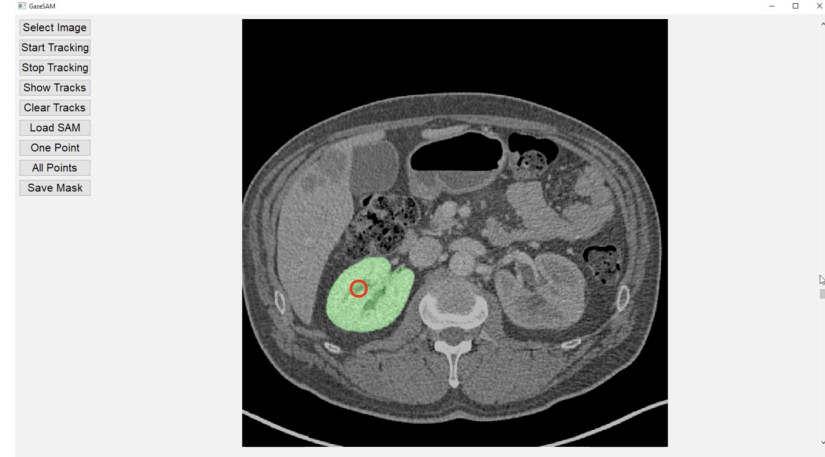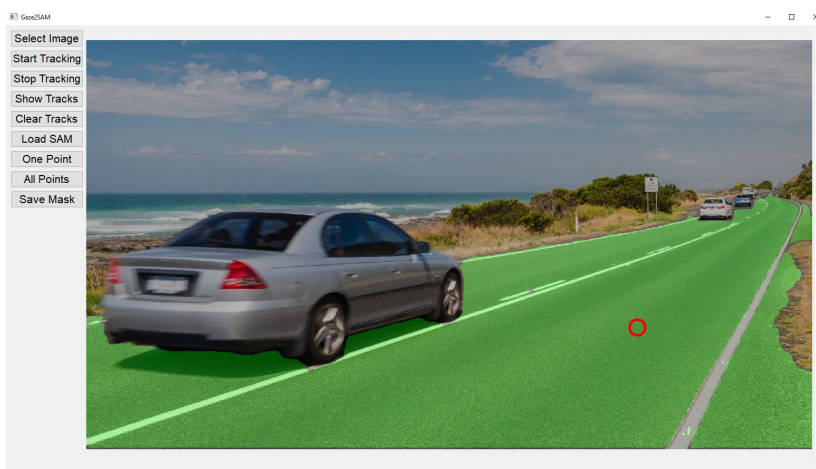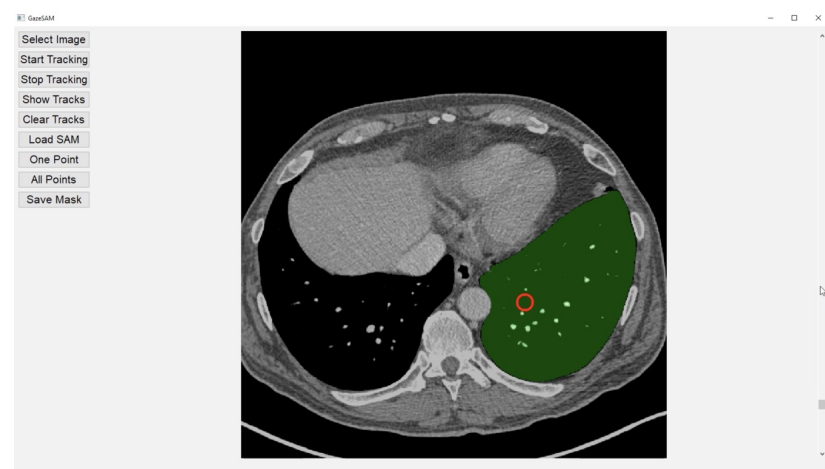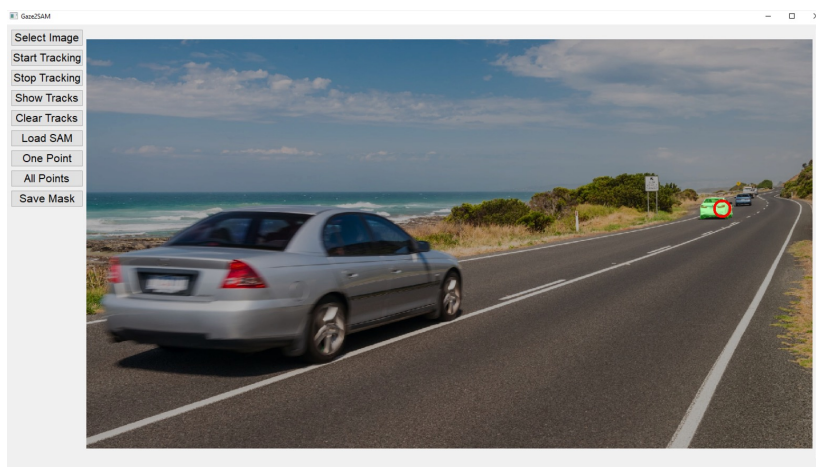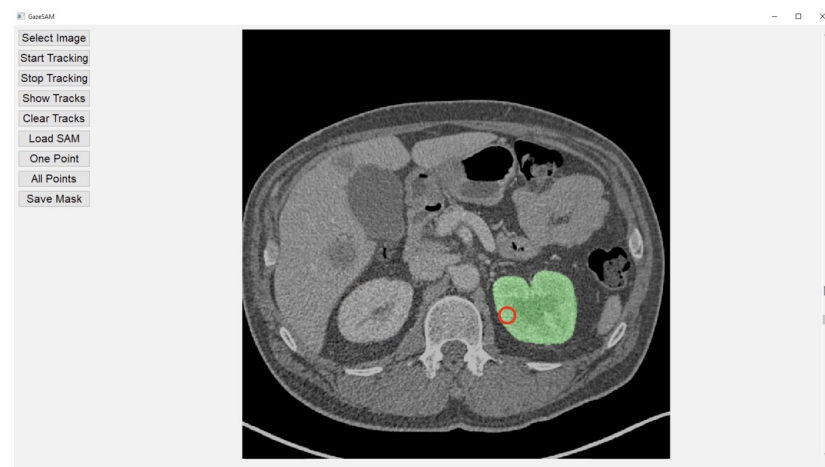

(a) 2D Image

(b) 3D Image

Supplement: supplementary_material [file attachment]

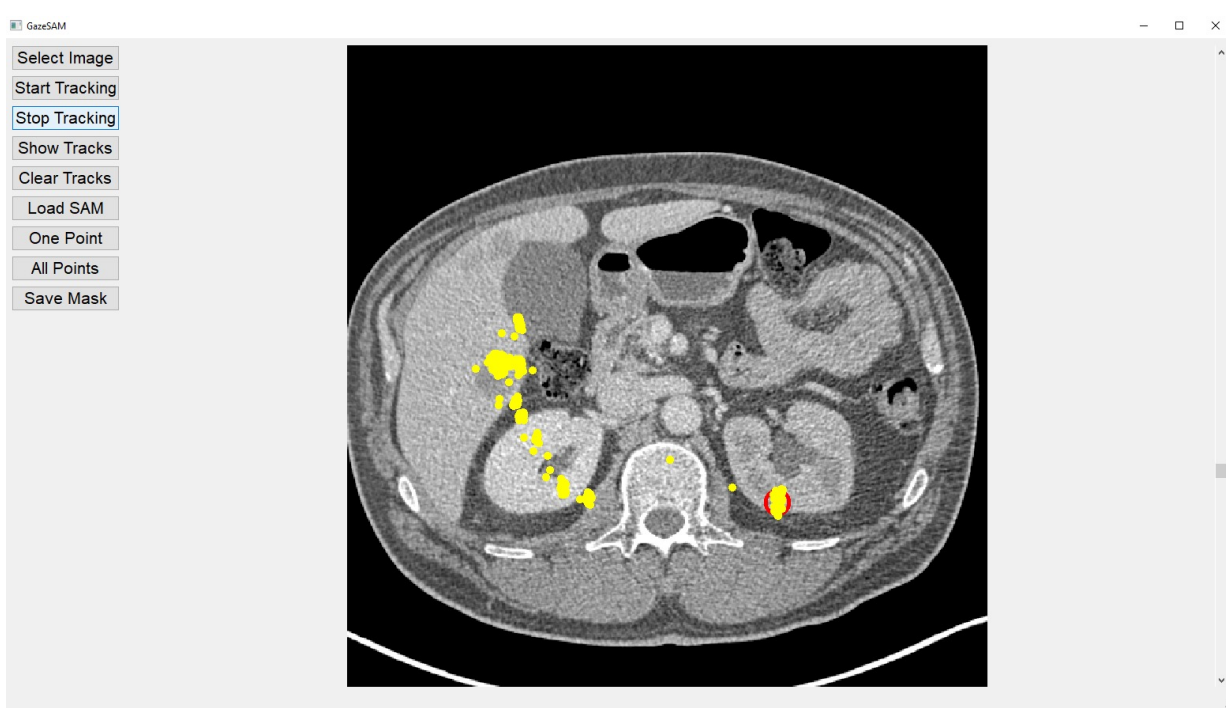

(a) Option 1 (All Points)

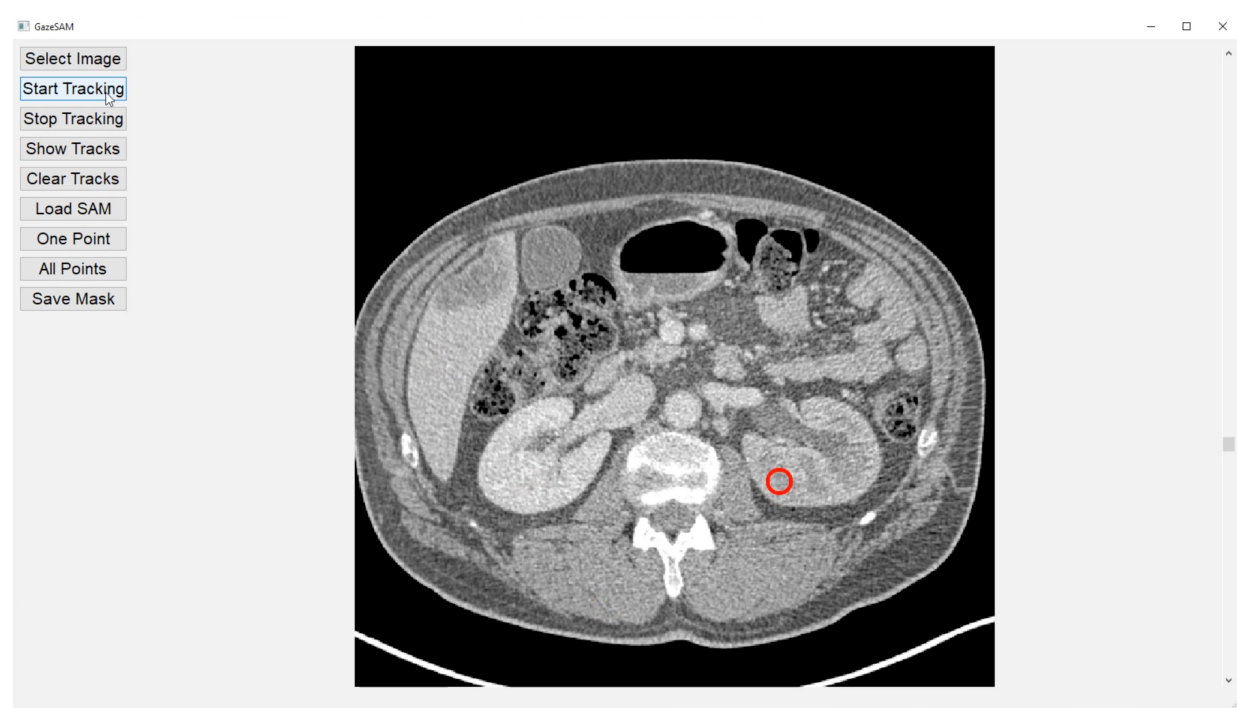

(b) Option 2 (One Point)

Supplement: supplementary_material [file attachment]

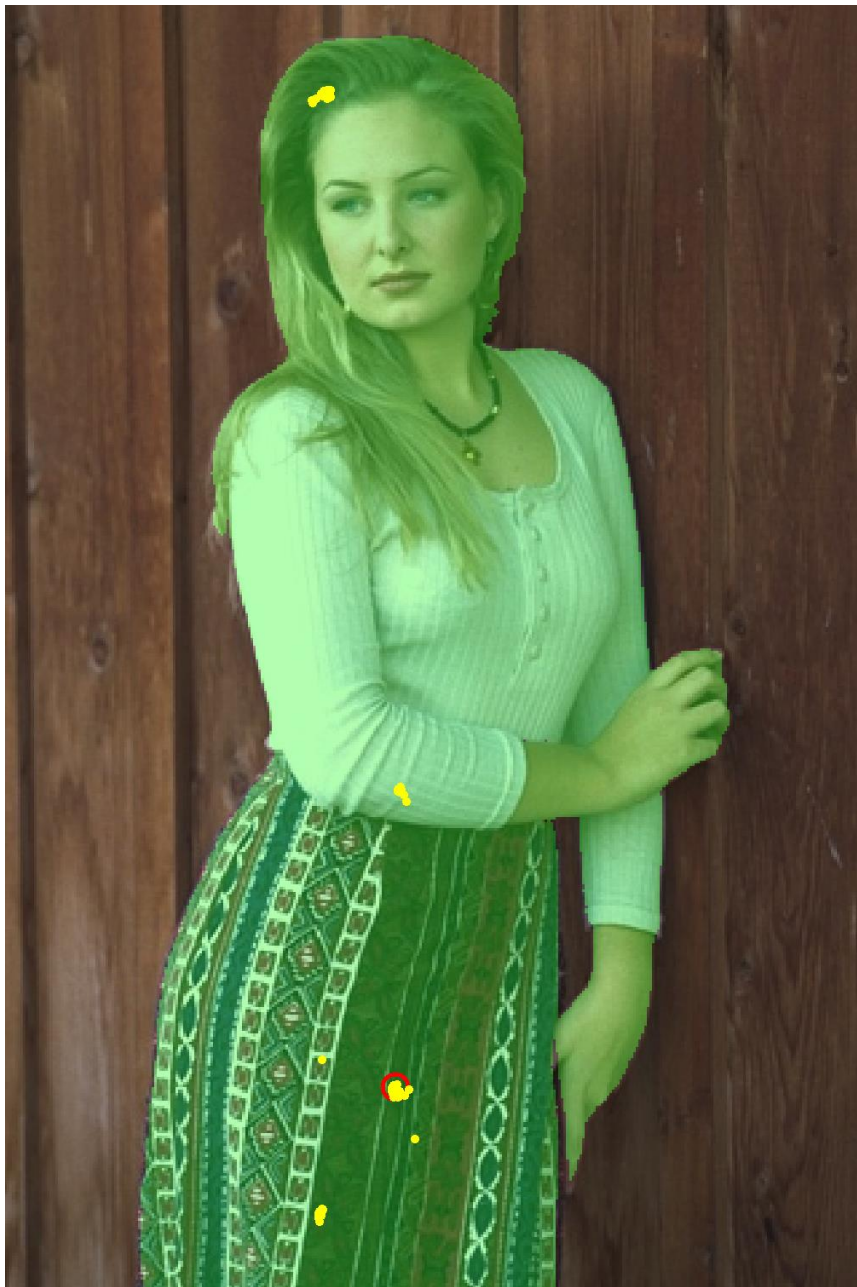

(a) Eye Gaze-based Interaction (<1s)

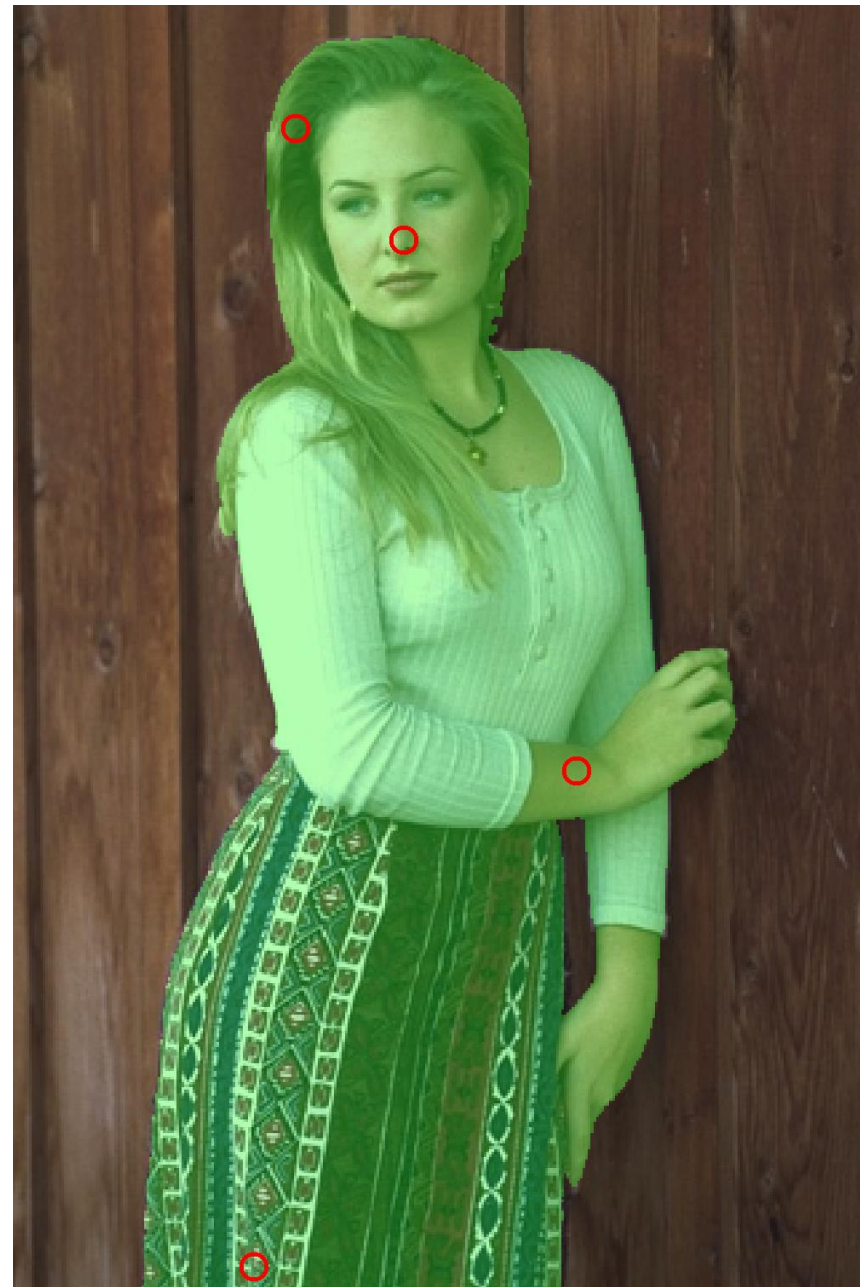

(b) Mouse-based Interaction (~1.5s)

Supplement: supplementary_material [file attachment]

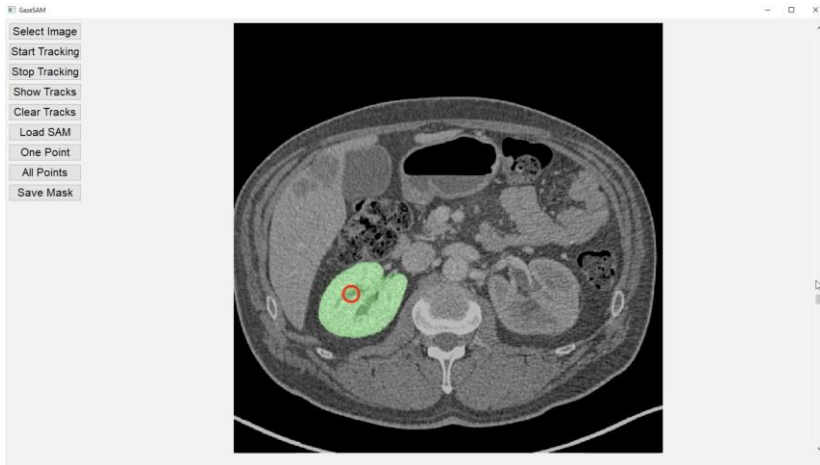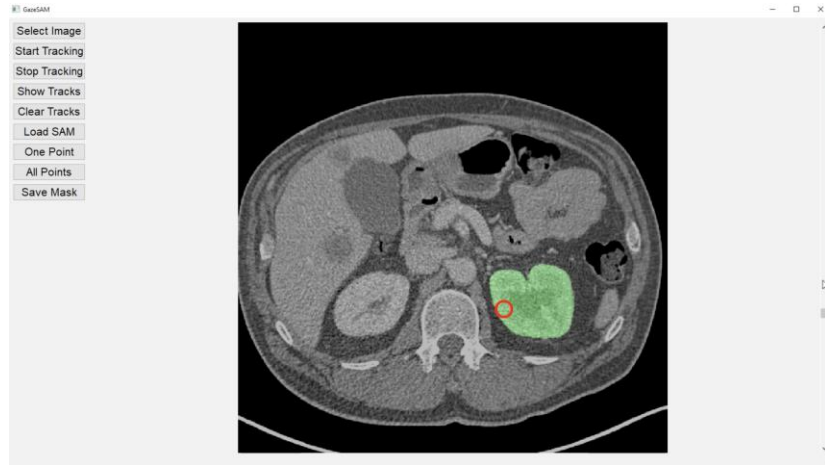

Supplement: supplementary_material [file attachment]
